# Supplementary material for: Predicting the adsorption of organic pollutants on boron nitride nanosheets via in silico techniques: DFT computations and QSAR modeling
Source: Royal Society of Chemistry journal article supplement (doi:10.1039/d0en01145b), 2021-01-01
Supplement: d0en01145b1.pdf [file d0en01145b1.pdf]

**Predicting Adsorption of Organic Pollutants on Boron Nitride Nanosheets via *in silico* Techniques: DFT  
Computations and QSAR Modeling**

Ya Wang,<sup>†</sup> Weihao Tang,<sup>‡</sup> Yue Peng,<sup>†,\*</sup> Zhongfang Chen,<sup>§,\*</sup> Jingwen Chen,<sup>‡,\*</sup> Zijun Xiao,<sup>‡</sup> Xiaoguang Zhao,<sup>||</sup> Yakun Qu<sup>||</sup>,  
Junhua Li<sup>†</sup>

<sup>†</sup> School of Environment, State Key Joint Laboratory of Environment Simulation and Pollution Control, Tsinghua University, Beijing 100084, China

<sup>‡</sup> Key Laboratory of Industrial Ecology and Environmental Engineering (MOE), School of Environmental Science and Technology, Dalian University of Technology, Linggong Road 2, Dalian 116024, China

<sup>§</sup> Department of Chemistry, University of Puerto Rico, San Juan, PR 00931, USA

<sup>||</sup> SINOPEC Research Institute of Petroleum Processing (RIPP), Beijing 100083, China

**Corresponding Authors**

\* Yue Peng, e-mail: [pengyue83@tsinghua.edu.cn](mailto:pengyue83@tsinghua.edu.cn)

\* Zhongfang Chen, e-mail: [zhongfangchen@gmail.com](mailto:zhongfangchen@gmail.com).

\* Jingwen Chen, e-mail: [jwchen@dlut.edu.cn](mailto:jwchen@dlut.edu.cn).

The SI consists of three tables and three figures. There are 14 pages in total.

## Contents

|                                                                                                                                                                                                        |    |
|--------------------------------------------------------------------------------------------------------------------------------------------------------------------------------------------------------|----|
| <b>Table S1.</b> Adsorption equilibrium configuration for the 28 organic compounds on boron nitride nanosheet .....                                                                                    | 4  |
| <b>Table S2.</b> Charge transfer between the compound and the boron nitride nanosheet from the adsorption complex.....                                                                                 | 11 |
| <b>Table S3.</b> Estimated logarithm values for adsorption equilibrium coefficient ( $\log K$ ) for fluorene from DFT computations and prediction models in the gaseous and aqueous environments ..... | 12 |
| <b>Figure S1.</b> Williams plots of standardized residuals ( $\delta^*$ ) versus leverage values ( $h$ ) for pp-LFER models ( $h^*$ denotes the warning leverage value).....                           | 13 |
| <b>Figure S2.</b> Williams plots of standardized residuals ( $\delta^*$ ) versus leverage values ( $h$ ) for QSAR models ( $h^*$ denotes the warning leverage value) .....                             | 13 |
| <b>Figure S3.</b> Non-covalent interactions (NCI) analysis for the interactions between $C_6H_6$ and $B_{15}N_{15}H_{14}$ with the Multiwfn program .....                                              | 14 |

**Table S1.** Adsorption equilibrium configuration for the 28 organic compounds on boron nitride nanosheet

| Gaseous phase                                                                                                                            | Aqueous phase                                                                                                                             | Gaseous phase                                                                                                                                  | Aqueous phase                                                                                                                                  |
|------------------------------------------------------------------------------------------------------------------------------------------|-------------------------------------------------------------------------------------------------------------------------------------------|------------------------------------------------------------------------------------------------------------------------------------------------|------------------------------------------------------------------------------------------------------------------------------------------------|
| 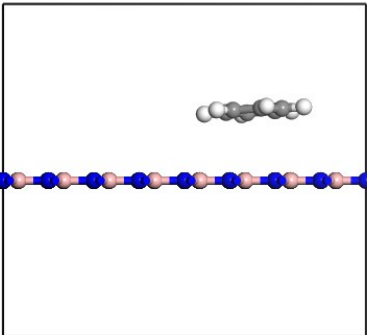 <p><math>d = 3.376 \text{ \AA}</math><br/>benzene</p>  |  <p><math>d = 3.408 \text{ \AA}</math><br/>benzene</p>  |  <p><math>d = 3.200 \text{ \AA}</math><br/>nitrobenzene</p> |  <p><math>d = 3.200 \text{ \AA}</math><br/>nitrobenzene</p> |
|  <p><math>d = 3.504 \text{ \AA}</math><br/>toluene</p> |  <p><math>d = 3.296 \text{ \AA}</math><br/>toluene</p> |  <p><math>d = 3.200 \text{ \AA}</math><br/>phenol</p>      |  <p><math>d = 3.392 \text{ \AA}</math><br/>phenol</p>      |

| Gaseous phase                                                                                                                                                                 | Aqueous phase                                                                                                                                                                  | Gaseous phase                                                                                                                                                                         | Aqueous phase                                                                                                                                                                         |
|-------------------------------------------------------------------------------------------------------------------------------------------------------------------------------|--------------------------------------------------------------------------------------------------------------------------------------------------------------------------------|---------------------------------------------------------------------------------------------------------------------------------------------------------------------------------------|---------------------------------------------------------------------------------------------------------------------------------------------------------------------------------------|
| 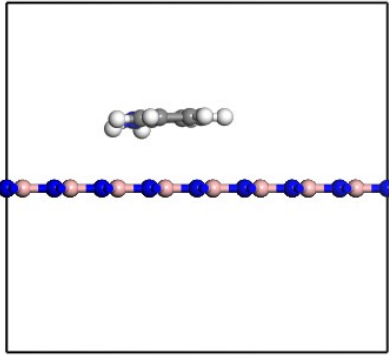 <p data-bbox="369 699 546 770"><math>d = 3.200 \text{ \AA}</math><br/>aniline</p>           |  <p data-bbox="813 699 990 770"><math>d = 3.248 \text{ \AA}</math><br/>aniline</p>           |  <p data-bbox="1238 699 1485 770"><math>d = 3.232 \text{ \AA}</math><br/>1,3-dinitrobenzene</p>    |  <p data-bbox="1682 699 1928 770"><math>d = 3.248 \text{ \AA}</math><br/>1,3-dinitrobenzene</p>    |
|  <p data-bbox="369 1201 546 1273"><math>d = 3.216 \text{ \AA}</math><br/>4-nitrotoluene</p> |  <p data-bbox="813 1201 990 1273"><math>d = 3.216 \text{ \AA}</math><br/>4-nitrotoluene</p> |  <p data-bbox="1238 1201 1485 1273"><math>d = 3.168 \text{ \AA}</math><br/>2,4-dinitrotoluene</p> |  <p data-bbox="1682 1201 1928 1273"><math>d = 3.216 \text{ \AA}</math><br/>2,4-dinitrotoluene</p> |

| Gaseous phase                                                                                                                              | Aqueous phase                                                                                                                               | Gaseous phase                                                                                                                                         | Aqueous phase                                                                                                                                         |
|--------------------------------------------------------------------------------------------------------------------------------------------|---------------------------------------------------------------------------------------------------------------------------------------------|-------------------------------------------------------------------------------------------------------------------------------------------------------|-------------------------------------------------------------------------------------------------------------------------------------------------------|
| 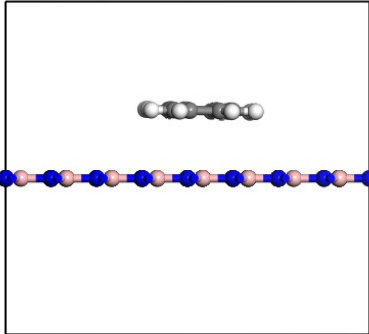 <p><math>d = 3.264 \text{ \AA}</math><br/>anthracene</p> |  <p><math>d = 3.200 \text{ \AA}</math><br/>anthracene</p> |  <p><math>d = 3.280 \text{ \AA}</math><br/>pyrene</p>              |  <p><math>d = 3.248 \text{ \AA}</math><br/>pyrene</p>              |
|  <p><math>d = 3.264 \text{ \AA}</math><br/>biphenyl</p>  |  <p><math>d = 3.264 \text{ \AA}</math><br/>biphenyl</p>  |  <p><math>d = 3.216 \text{ \AA}</math><br/>3,5-dimethylphenol</p> |  <p><math>d = 3.232 \text{ \AA}</math><br/>3,5-dimethylphenol</p> |

| Gaseous phase                                                                                                                                                                 | Aqueous phase                                                                                                                                                                   | Gaseous phase                                                                                                                                                                               | Aqueous phase                                                                                                                                                                               |
|-------------------------------------------------------------------------------------------------------------------------------------------------------------------------------|---------------------------------------------------------------------------------------------------------------------------------------------------------------------------------|---------------------------------------------------------------------------------------------------------------------------------------------------------------------------------------------|---------------------------------------------------------------------------------------------------------------------------------------------------------------------------------------------|
| 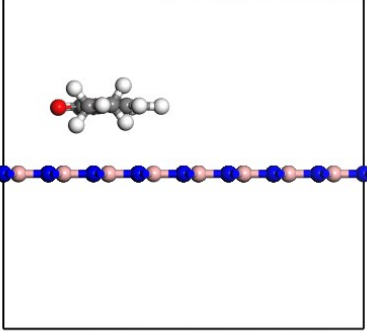 <p data-bbox="360 659 546 735"><math>d = 3.264 \text{ \AA}</math><br/>ethylbenzoate</p>     |  <p data-bbox="815 659 994 735"><math>d = 3.280 \text{ \AA}</math><br/>ethylbenzoate</p>      |  <p data-bbox="1270 659 1449 735"><math>d = 3.232 \text{ \AA}</math><br/>4-ethylphenol</p>               |  <p data-bbox="1711 659 1890 735"><math>d = 3.280 \text{ \AA}</math><br/>4-ethylphenol</p>               |
|  <p data-bbox="344 1166 562 1243"><math>d = 3.232 \text{ \AA}</math><br/>methylbenzoate</p> |  <p data-bbox="799 1166 1010 1243"><math>d = 3.248 \text{ \AA}</math><br/>methylbenzoate</p> |  <p data-bbox="1184 1158 1532 1243"><math>d = 3.280 \text{ \AA}</math><br/>(3-methylphenyl)methanol</p> |  <p data-bbox="1621 1158 1971 1243"><math>d = 3.216 \text{ \AA}</math><br/>(3-methylphenyl)methanol</p> |

| Gaseous phase                                                                                                                                                                   | Aqueous phase                                                                                                                                                                     | Gaseous phase                                                                                                                                                                     | Aqueous phase                                                                                                                                                                     |
|---------------------------------------------------------------------------------------------------------------------------------------------------------------------------------|-----------------------------------------------------------------------------------------------------------------------------------------------------------------------------------|-----------------------------------------------------------------------------------------------------------------------------------------------------------------------------------|-----------------------------------------------------------------------------------------------------------------------------------------------------------------------------------|
| 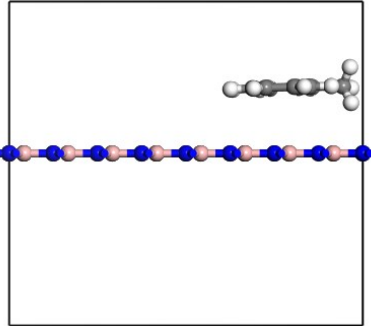 <p data-bbox="315 659 584 735"><math>d = 3.264 \text{ \AA}</math><br/>1-methylnaphthalene</p> |  <p data-bbox="763 659 1032 735"><math>d = 3.280 \text{ \AA}</math><br/>1-methylnaphthalene</p> |  <p data-bbox="1267 659 1449 735"><math>d = 3.616 \text{ \AA}</math><br/>phenylacetate</p>     |  <p data-bbox="1704 659 1886 735"><math>d = 3.600 \text{ \AA}</math><br/>phenylacetate</p>     |
|  <p data-bbox="338 1161 557 1238"><math>d = 3.248 \text{ \AA}</math><br/>2-phenylethanol</p>  |  <p data-bbox="792 1161 1010 1238"><math>d = 3.264 \text{ \AA}</math><br/>2-phenylethanol</p>  |  <p data-bbox="1249 1161 1464 1238"><math>d = 3.648 \text{ \AA}</math><br/>phenylmethanol</p> |  <p data-bbox="1682 1161 1899 1238"><math>d = 3.440 \text{ \AA}</math><br/>phenylmethanol</p> |



| Gaseous phase                                                                                                                                 | Aqueous phase                                                                                                                                  | Gaseous phase                                                                                                                              | Aqueous phase                                                                                                                              |
|-----------------------------------------------------------------------------------------------------------------------------------------------|------------------------------------------------------------------------------------------------------------------------------------------------|--------------------------------------------------------------------------------------------------------------------------------------------|--------------------------------------------------------------------------------------------------------------------------------------------|
| 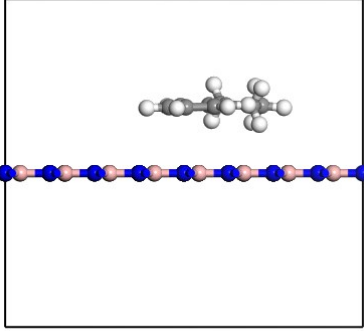 <p><math>d = 3.280 \text{ \AA}</math><br/>propylbenzene</p> |  <p><math>d = 3.344 \text{ \AA}</math><br/>propylbenzene</p> |  <p><math>d = 3.264 \text{ \AA}</math><br/>p-xylene</p> |  <p><math>d = 3.264 \text{ \AA}</math><br/>p-xylene</p> |
|  <p><math>d = 3.568 \text{ \AA}</math><br/>DMP</p>          |  <p><math>d = 3.568 \text{ \AA}</math><br/>DMP</p>          |  <p><math>d = 3.680 \text{ \AA}</math><br/>DEP</p>     |  <p><math>d = 3.488 \text{ \AA}</math><br/>DEP</p>     |

| Gaseous phase                                                                                                                                                                     | Aqueous phase                                                                                                                                                                       | Gaseous phase                                                                                                                                                                   | Aqueous phase                                                                                                                                                                   |
|-----------------------------------------------------------------------------------------------------------------------------------------------------------------------------------|-------------------------------------------------------------------------------------------------------------------------------------------------------------------------------------|---------------------------------------------------------------------------------------------------------------------------------------------------------------------------------|---------------------------------------------------------------------------------------------------------------------------------------------------------------------------------|
| 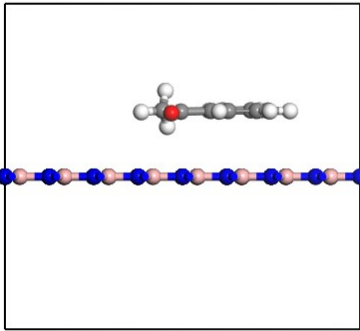 <p data-bbox="360 660 539 735"><math>d = 3.216 \text{ \AA}</math><br/>acetophenone</p>          |  <p data-bbox="808 660 987 735"><math>d = 3.296 \text{ \AA}</math><br/>acetophenone</p>           |  <p data-bbox="1279 660 1447 735"><math>d = 3.280 \text{ \AA}</math><br/>naphthalene</p>     |  <p data-bbox="1715 639 1883 719"><math>d = 3.264 \text{ \AA}</math><br/>naphthalene</p>     |
|  <p data-bbox="327 1118 573 1193"><math>d = 3.440 \text{ \AA}</math><br/>1,2-dinitrobenzene</p> |  <p data-bbox="775 1118 1021 1193"><math>d = 3.392 \text{ \AA}</math><br/>1,2-dinitrobenzene</p> |  <p data-bbox="1267 1118 1447 1193"><math>d = 3.280 \text{ \AA}</math><br/>phenanthrene</p> |  <p data-bbox="1704 1118 1883 1193"><math>d = 3.264 \text{ \AA}</math><br/>phenanthrene</p> |

$d$  denotes the distance between the center of molecule and that of the boron nitride surface.

**Table S2.** Charge transfer between the compound and the boron nitride nanosheet from the adsorption complex

| No. | Compound            | Charge transfer (e)* |               | No. | Compound                 | Charge transfer (e)* |               |
|-----|---------------------|----------------------|---------------|-----|--------------------------|----------------------|---------------|
|     |                     | Gaseous phase        | Aqueous phase |     |                          | Gaseous phase        | Aqueous phase |
| 1   | benzene             | 0.009                | 0.011         | 15  | methylbenzoate           | -0.024               | -0.024        |
| 2   | nitrobenzene        | -0.003               | -0.006        | 16  | (3-methylphenyl)methanol | -0.054               | -0.029        |
| 3   | toluene             | -0.010               | -0.017        | 17  | 1-methylnaphthalene      | -0.017               | -0.018        |
| 4   | phenol              | 0.004                | 0.013         | 18  | phenylacetate            | 0.008                | 0.016         |
| 5   | aniline             | -0.018               | -0.015        | 19  | 2-phenylethanol          | -0.049               | -0.029        |
| 6   | 1,3-dinitrobenzene  | -0.016               | -0.014        | 20  | phenylmethanol           | -0.016               | -0.032        |
| 7   | 4-nitrotoluene      | -0.021               | -0.019        | 21  | propylbenzene            | -0.064               | -0.063        |
| 8   | 2, 4-dinitrotoluene | -0.027               | -0.051        | 22  | p-xylene                 | -0.045               | -0.046        |
| 9   | anthracene          | 0.011                | 0.023         | 23  | dimethyl phthalate (DMP) | -0.022               | -0.018        |
| 10  | pyrene              | 0.016                | 0.016         | 24  | diethyl phthalate (DEP)  | -0.030               | -0.096        |
| 11  | biphenyl            | 0.009                | 0.006         | 25  | acetophenone             | -0.035               | -0.029        |
| 12  | 3,5-dimethylphenol  | -0.035               | -0.039        | 26  | naphthalene              | 0.006                | 0.005         |
| 13  | ethylbenzoate       | -0.053               | -0.048        | 27  | 1,2-dinitrobenzene       | -0.010               | 0.003         |
| 14  | 4-ethylphenol       | -0.022               | -0.033        | 28  | phenanthrene             | 0.010                | 0.009         |

\*Charge transfer: the positive value represents that the electron transfers from the compound to the boron nitride nanosheet, while the negative value means that the electron transfers from the boron nitride nanosheet to the compound.

**Table S3.** Estimated logarithm values for adsorption equilibrium coefficient ( $\log K$ ) for fluorene from DFT computations and prediction models in the gaseous and aqueous environments

| Model            | Gaseous        |                      | Aqueous        |                      |
|------------------|----------------|----------------------|----------------|----------------------|
|                  | $\log K$ (DFT) | $\log K$ (predicted) | $\log K$ (DFT) | $\log K$ (predicted) |
| Eq 9 (pp-LFERs)  | 14.90          | 12.25                | -              | -                    |
| Eq 10 (pp-LFERs) | -              | -                    | 9.97           | 10.13                |
| Eq 11 (QSAR)     | 14.90          | 11.10                | -              | -                    |
| Eq 12 (QSAR)     | -              | -                    | 9.97           | 11.21                |

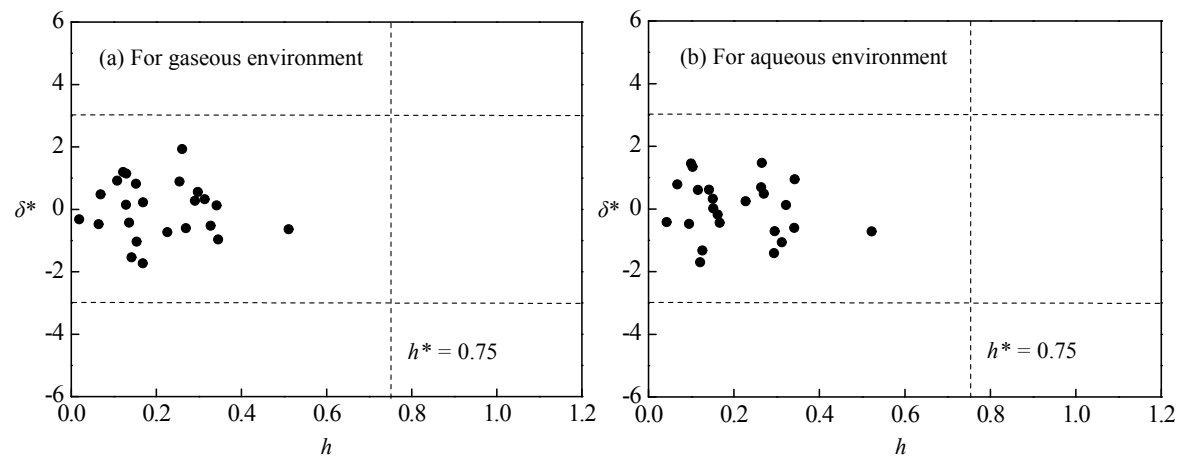

**Figure S1.** Williams plots of standardized residuals ( $\delta^*$ ) versus leverage values ( $h$ ) for pp-LFER models ( $h^*$  denotes the warning leverage value)

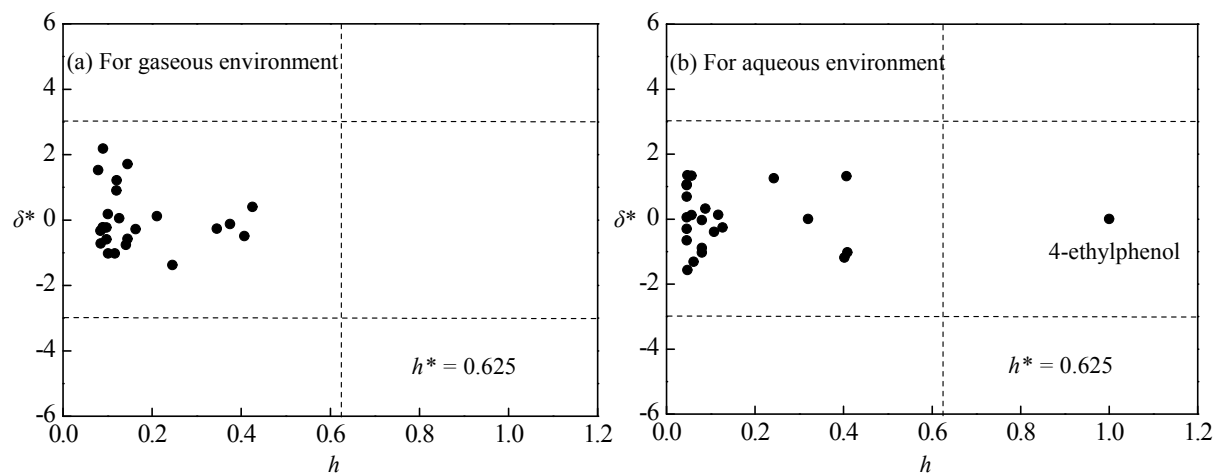

**Figure S2.** Williams plots of standardized residuals ( $\delta^*$ ) versus leverage values ( $h$ ) for QSAR models ( $h^*$  denotes the warning leverage value)

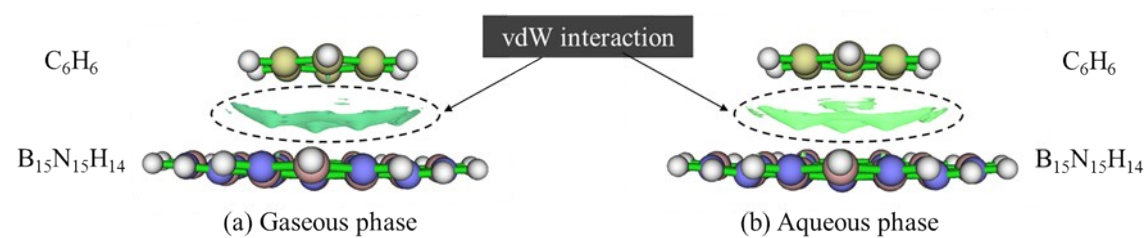

**Figure S3.** Non-covalent interactions (NCI) analysis for the interactions between  $C_6H_6$  and  $B_{15}N_{15}H_{14}$  with the Multiwfn<sup>1</sup> program

## REFERENCES

- (1) Lu, T. and Chen, F. Multiwfn: A multifunctional wavefunction analyzer. *J. Comput. Chem.* **2012**, 33 (5), 580-592.
